# Supplementary figures and images for: Nuclear quantum effects in two-hydrogen intermediates on graphene-embedded transition metal atoms
Source: Royal Society of Chemistry journal article supplement (doi:10.1039/d5cp00820d), 2025-01-01

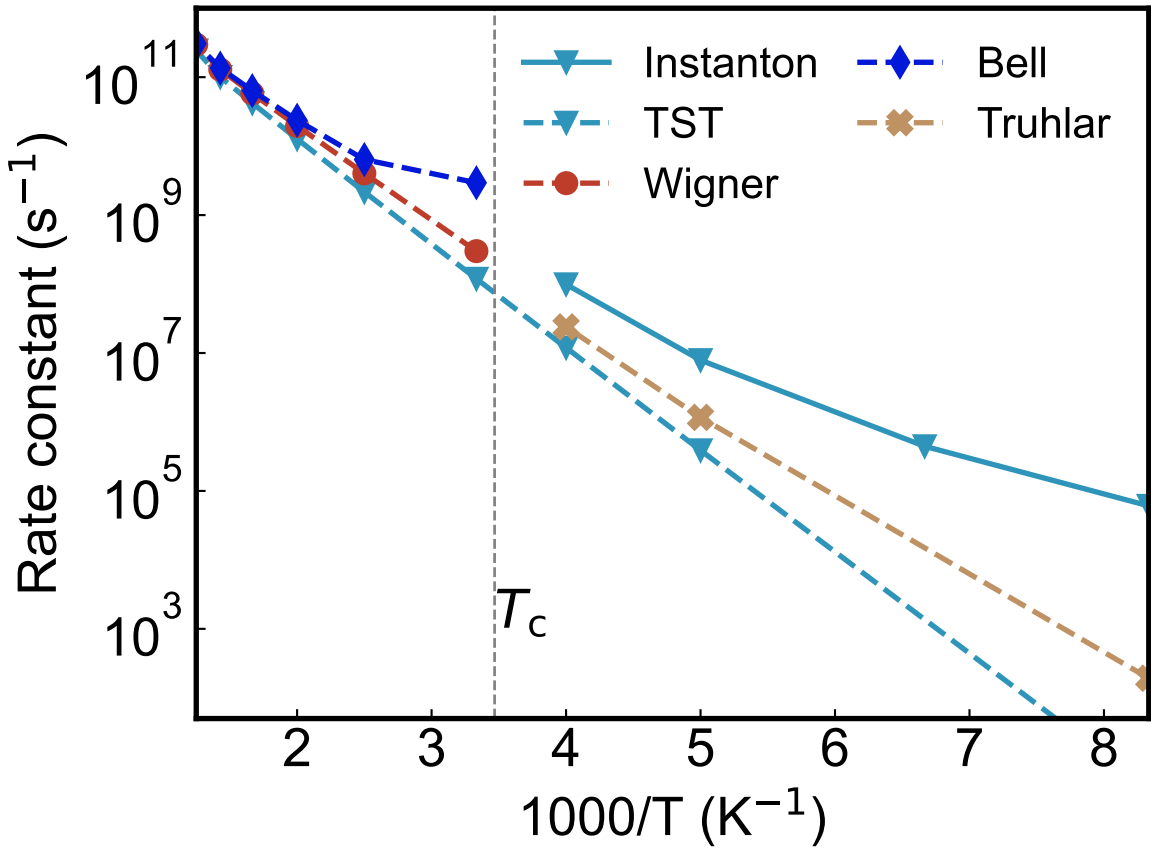

Supplement: d5cp00820d1.zip [file d5cp00820d1.zip]
